# Supplementary material for: Near-infrared-laser-driven robust glass-ceramic-based upconverted solid-state-lighting
Source: Royal Society of Chemistry journal article supplement (doi:10.1039/c9tc00606k), 2019-01-01
Supplement: c9tc00606k1.pdf [file c9tc00606k1.pdf]

# Electronic Supporting Information

## Near-Infrared-Laser-Driven Robust Glass-Ceramic-Based Upconverted Solid-State-Lighting

Jiangkun Chen,<sup>a,c,d</sup> Yongzhao Peng,<sup>b</sup> Xinyue Li,<sup>b</sup> Wu Chen,<sup>a,c,d</sup> Hai Huang,<sup>a,c,d</sup> Lin Lin,<sup>a,c,d</sup>

Daqin Chen<sup>\*,a,b,c</sup>

<sup>a</sup>College of Physics and Energy, Fujian Normal University, Fujian Provincial Key Laboratory of Quantum Manipulation and New Energy Materials, Fuzhou, Fujian 350117, China

<sup>b</sup>College of Materials & Environmental Engineering, Hangzhou Dianzi University, Hangzhou, Zhejiang 310018, China

<sup>c</sup>Fujian Provincial Collaborative Innovation Center for Optoelectronic Semiconductors and Efficient Devices, Xiamen, Fujian, 361005, China

<sup>d</sup>Fujian Provincial Engineering Technology Research Center of Solar Energy Conversion and Energy Storage, Fuzhou, Fujian, 350117, China

\*Corresponding author, E-Mail: [dqchen@fjnu.edu.cn](mailto:dqchen@fjnu.edu.cn) (D. Q. Chen)

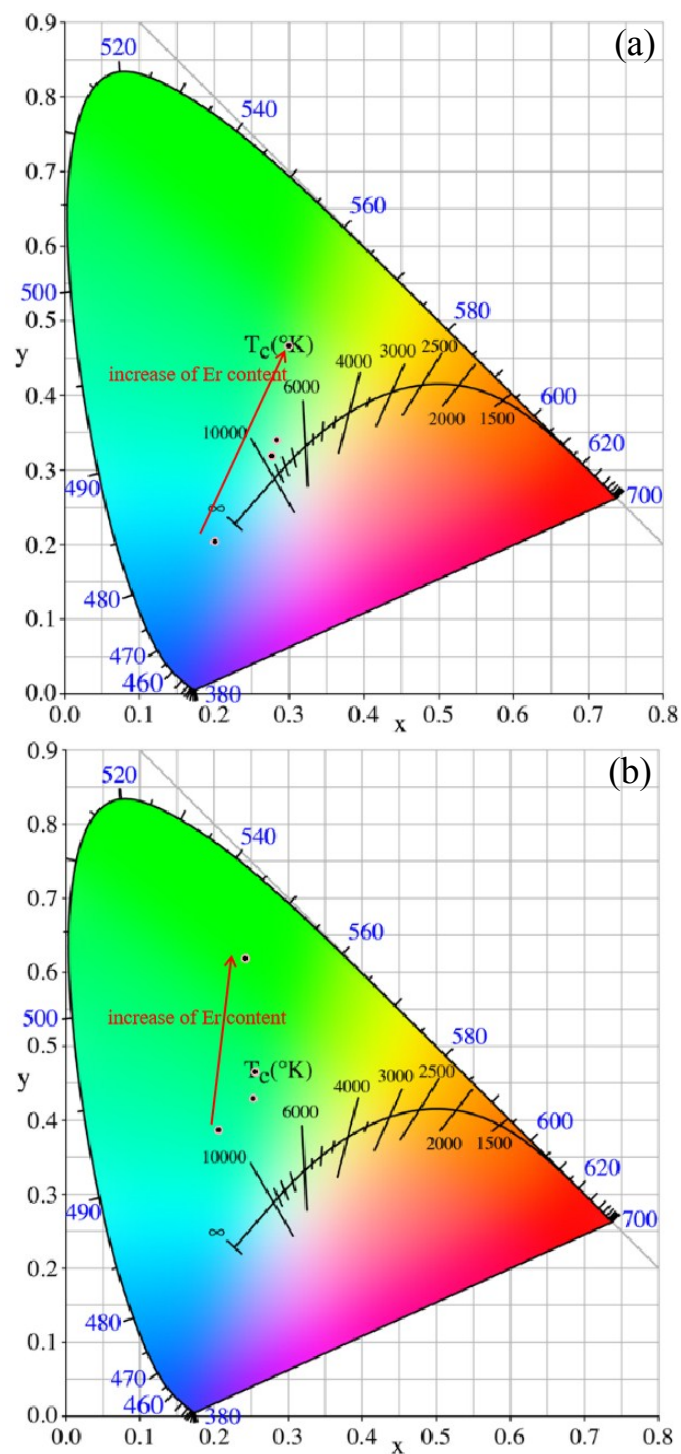

**Figure S1** Dependence of CIE color coordinates for a series of Yb/Tm/Er (20/0.25/x, mol%) doped GCs with different Er<sup>3+</sup> contents: (a)  $\alpha$ -NaYF<sub>4</sub> GC (x=0.25, 0.35, 0.45, 0.50), (b)  $\beta$ -NaYF<sub>4</sub> GC (x=0.06, 0.09, 0.12, 0.25).

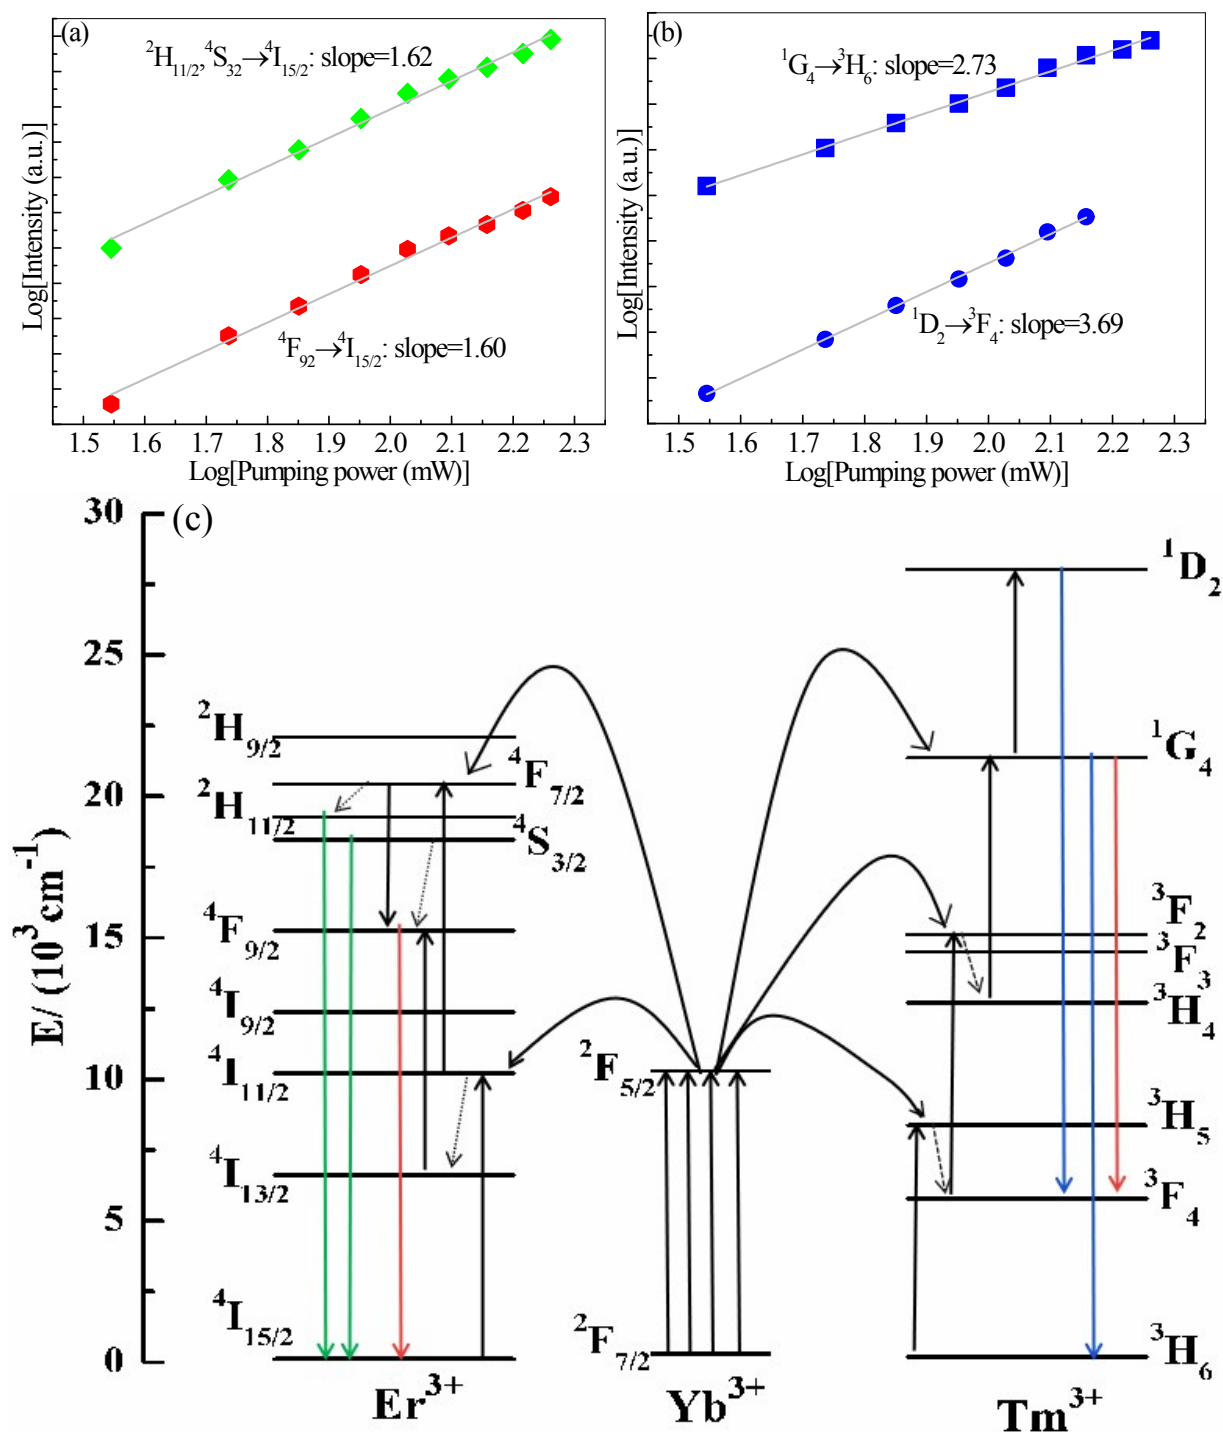

**Figure S2** Log-log plots of UC intensity versus NIR excitation power for the investigated GC samples: (a) Yb/Er doped GC and (b) Yb/Tm doped GC. (c) Schematic illustration of energy transfer processes to achieve blue, green and red UC emissions in Yb/Tm/Er doped GCs.

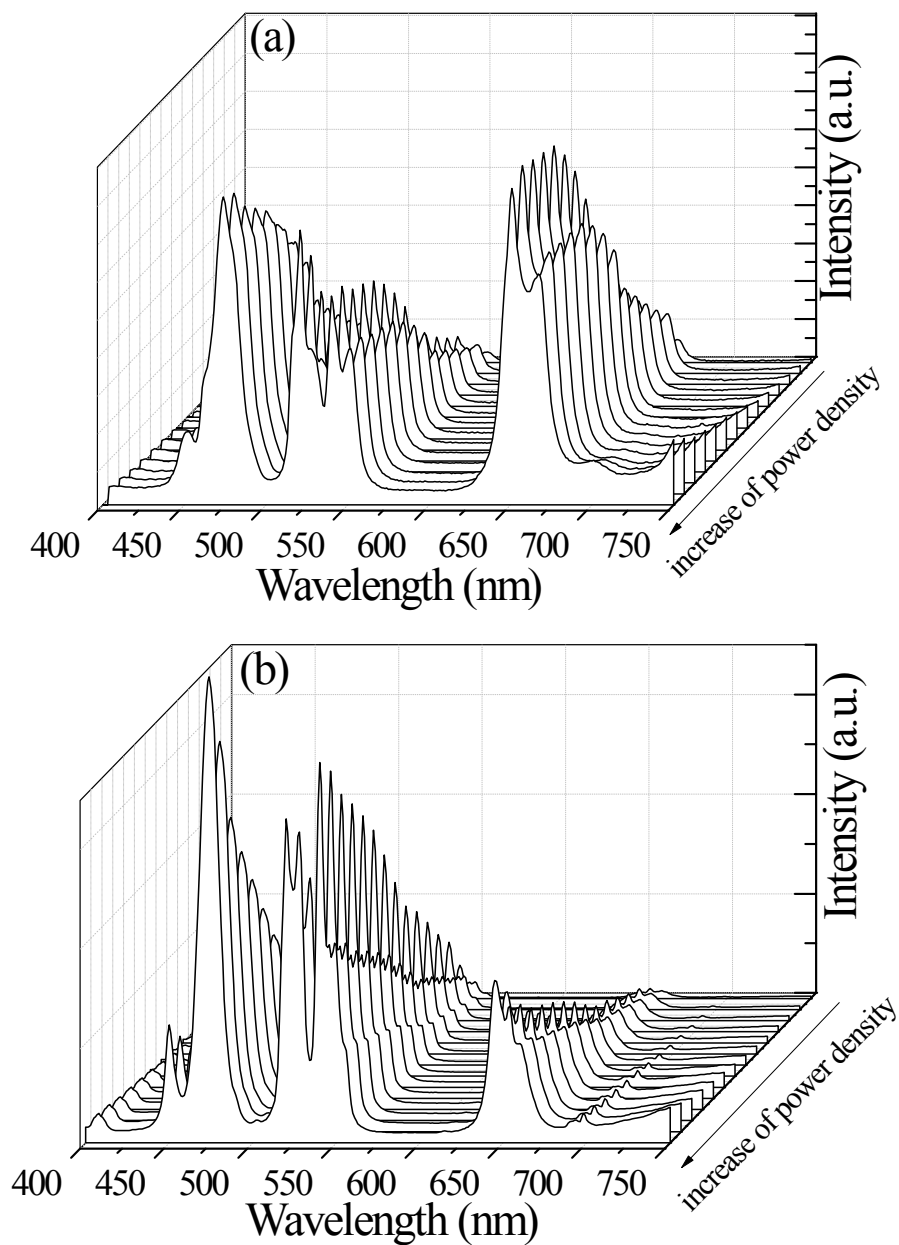

**Figure S3** Laser power density dependent UC emission spectra for (a) Yb/Tm/Er (20/0.25/0.45 mol%) doped  $\alpha$ -NaYF<sub>4</sub> GC and (b) Yb/Tm/Er (20/0.25/0.12 mol%) doped  $\beta$ -NaYF<sub>4</sub> GC.

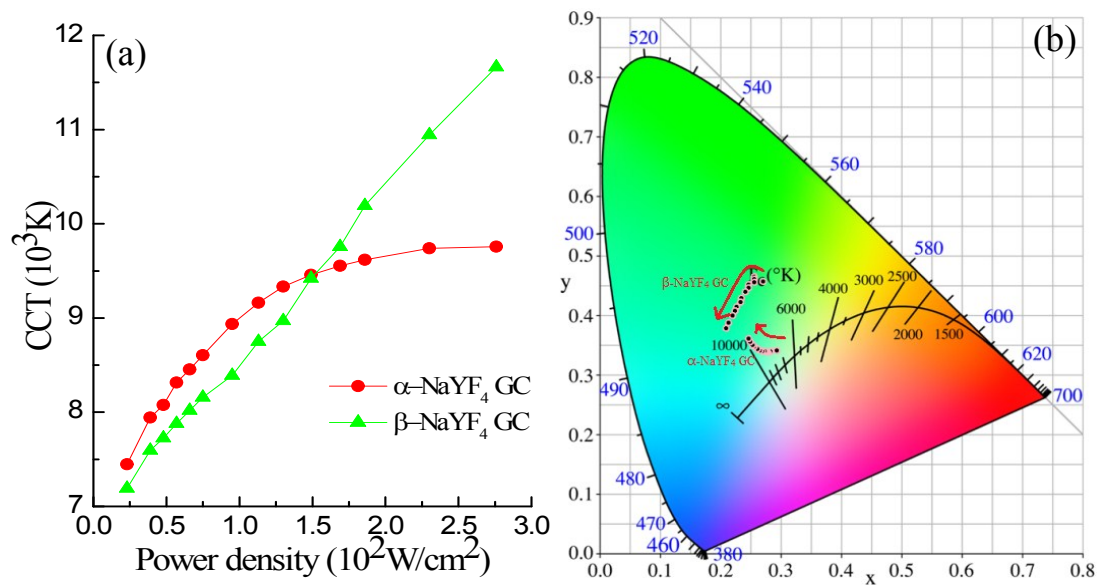

**Figure S4** Variation of (a) CCT and (b) CIE color coordinates for the GC-based (Yb/Tm/Er doped  $\alpha\text{-NaYF}_4\text{ GC}$  or  $\beta\text{-NaYF}_4\text{ GC}$ ) UC lighting with increase of incident laser powder density.

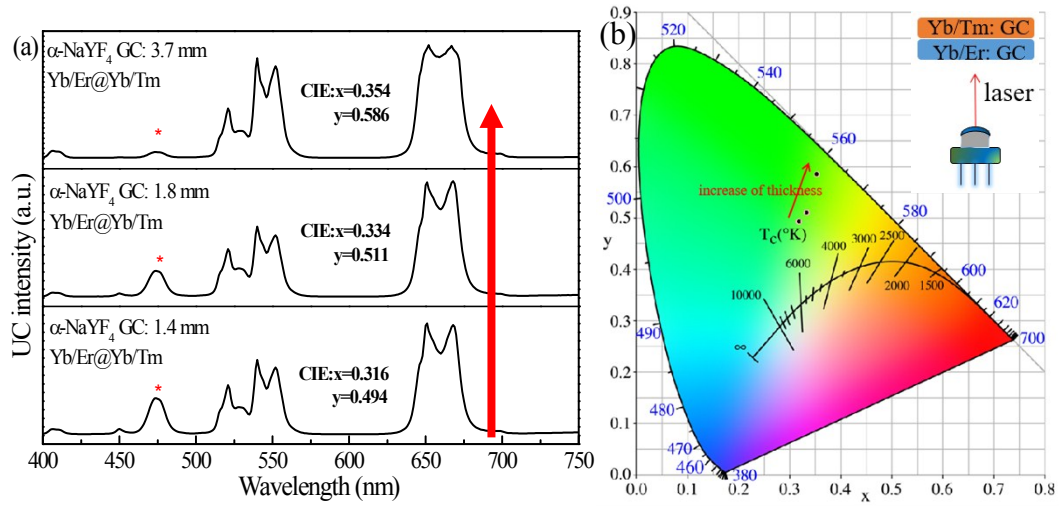

**Figure S5** Variation of (a) UC emission spectra and (b) CIE color coordinates for the GC-based UC lighting with increase of  $\alpha$ -NaYF<sub>4</sub> GC thickness. The Yb/Er doped  $\alpha$ -NaYF<sub>4</sub> GC @ Yb/Tm doped  $\beta$ -NaYF<sub>4</sub> GC stacking structure (denoted as Yb/Er@Yb/Tm) is used as color converter.

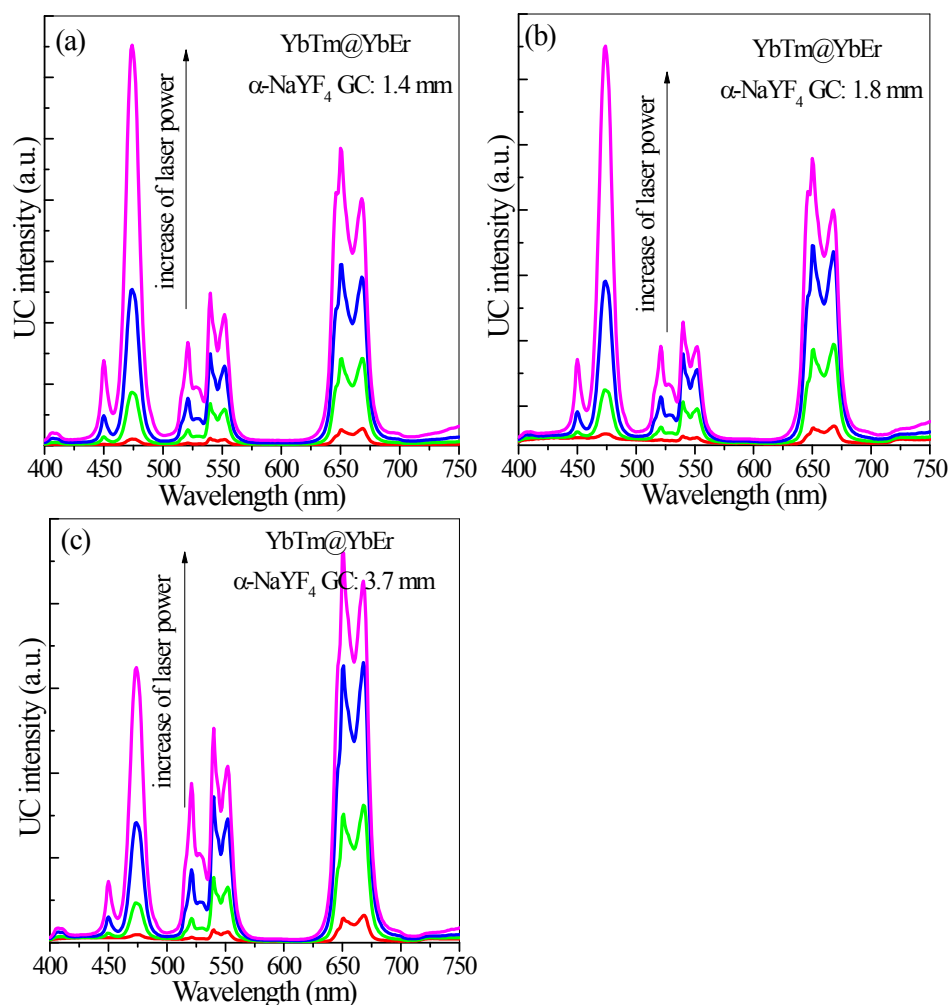

**Figure S6** Laser powder dependent UC emission spectra for the constructed GC-based UC lighting with increase of  $\alpha$ -NaYF<sub>4</sub> GC thickness: (a) 1.4 mm, (b) 1.8 mm and (c) 3.7 mm. The Yb/Tm doped  $\beta$ -NaYF<sub>4</sub> GC @ Yb/Er doped  $\alpha$ -NaYF<sub>4</sub> GC stacking structure (denoted as Yb/Tm@Yb/Er) is used as color converter.

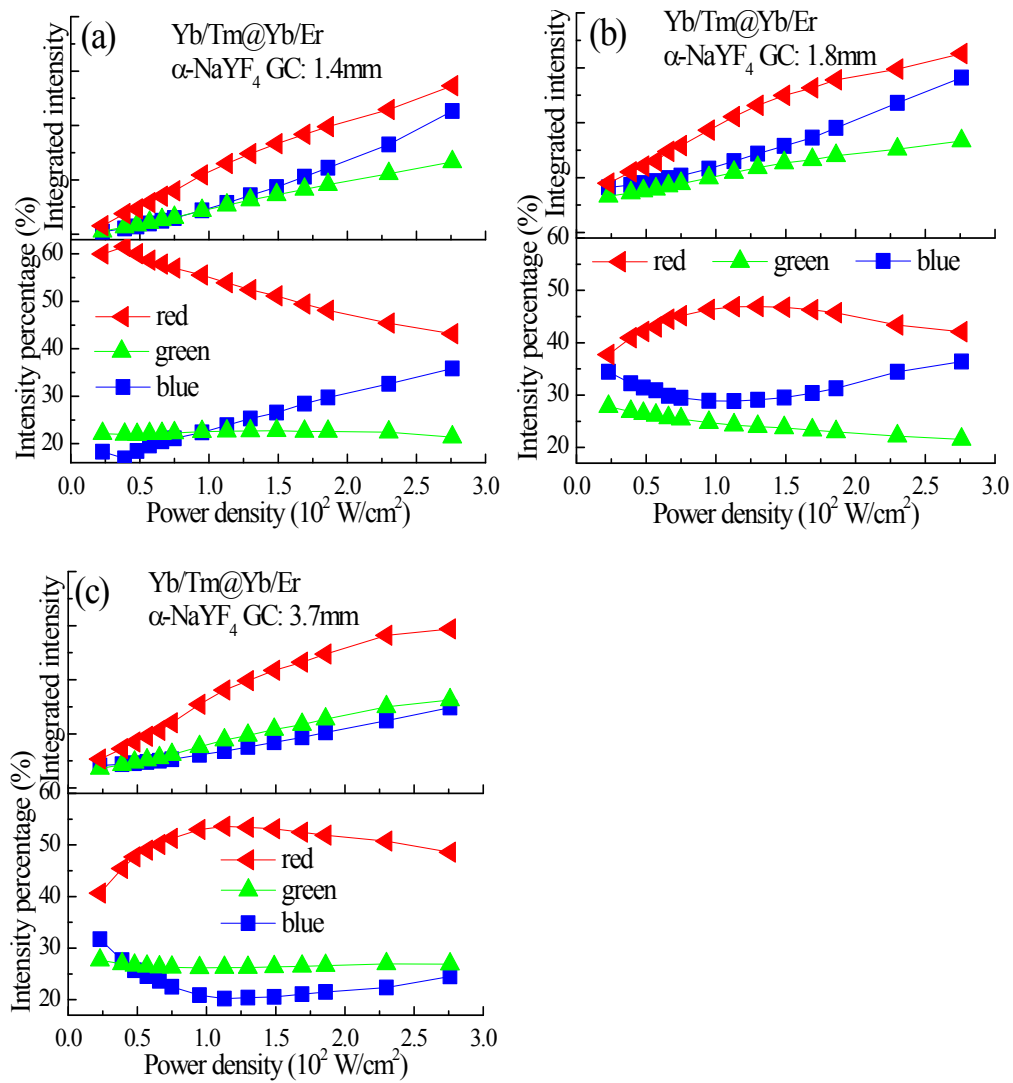

**Figure S7** Dependence of red/green/blue emission intensities and the corresponding intensity percentage for the constructed GC-based UC lighting with increase of  $\alpha$ -NaYF<sub>4</sub> GC thickness: (a) 1.4 mm, (b) 1.8 mm and (c) 3.7 mm. The Yb/Tm doped  $\beta$ -NaYF<sub>4</sub> GC @ Yb/Er doped  $\alpha$ -NaYF<sub>4</sub> GC stacking structure (denoted as Yb/Tm@Yb/Er) is used as color converter.



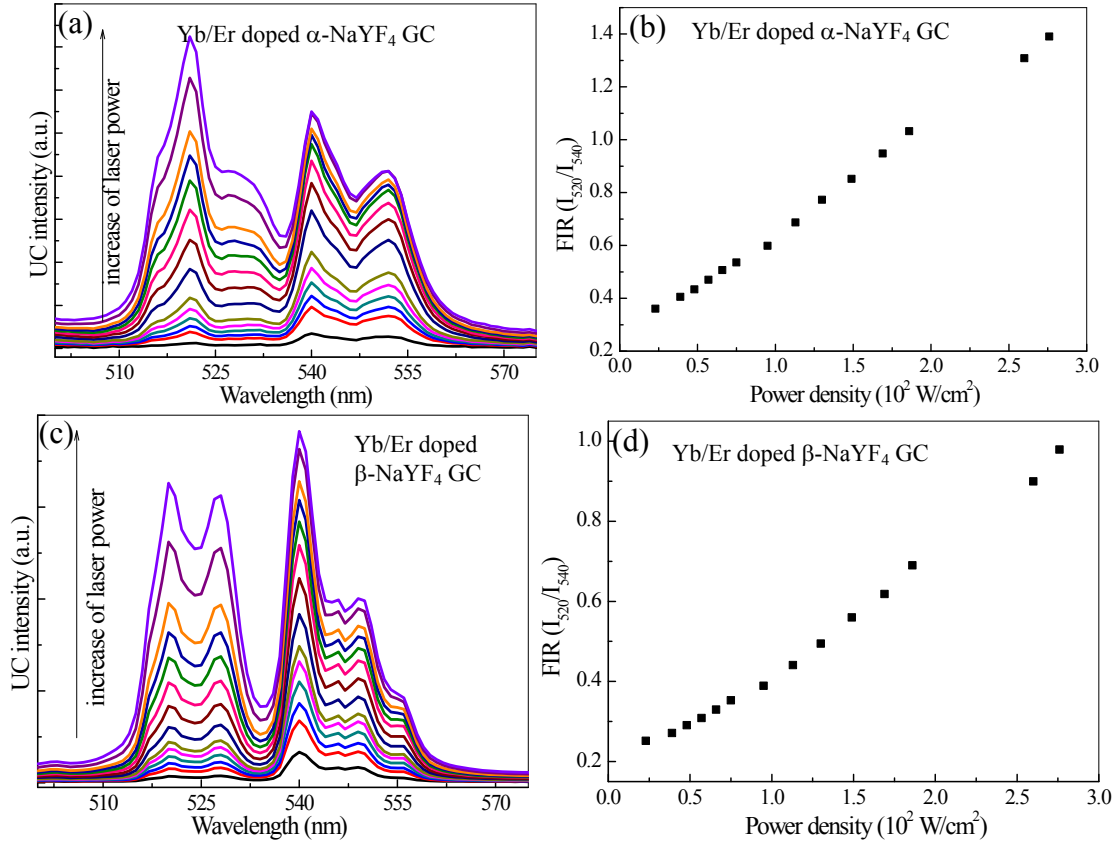

**Figure S8** Laser power dependent UC emission spectra for the (a) Yb/Er doped  $\alpha$ -NaYF<sub>4</sub> GC and (c)  $\beta$ -NaYF<sub>4</sub> GC samples. (b, d) The calculated FIR value between  $^2H_{11/2} \rightarrow ^4I_{15/2}$  transition ( $I_{520}$ ) and  $^4S_{3/2} \rightarrow ^4I_{15/2}$  one ( $I_{540}$ ) versus laser power density.

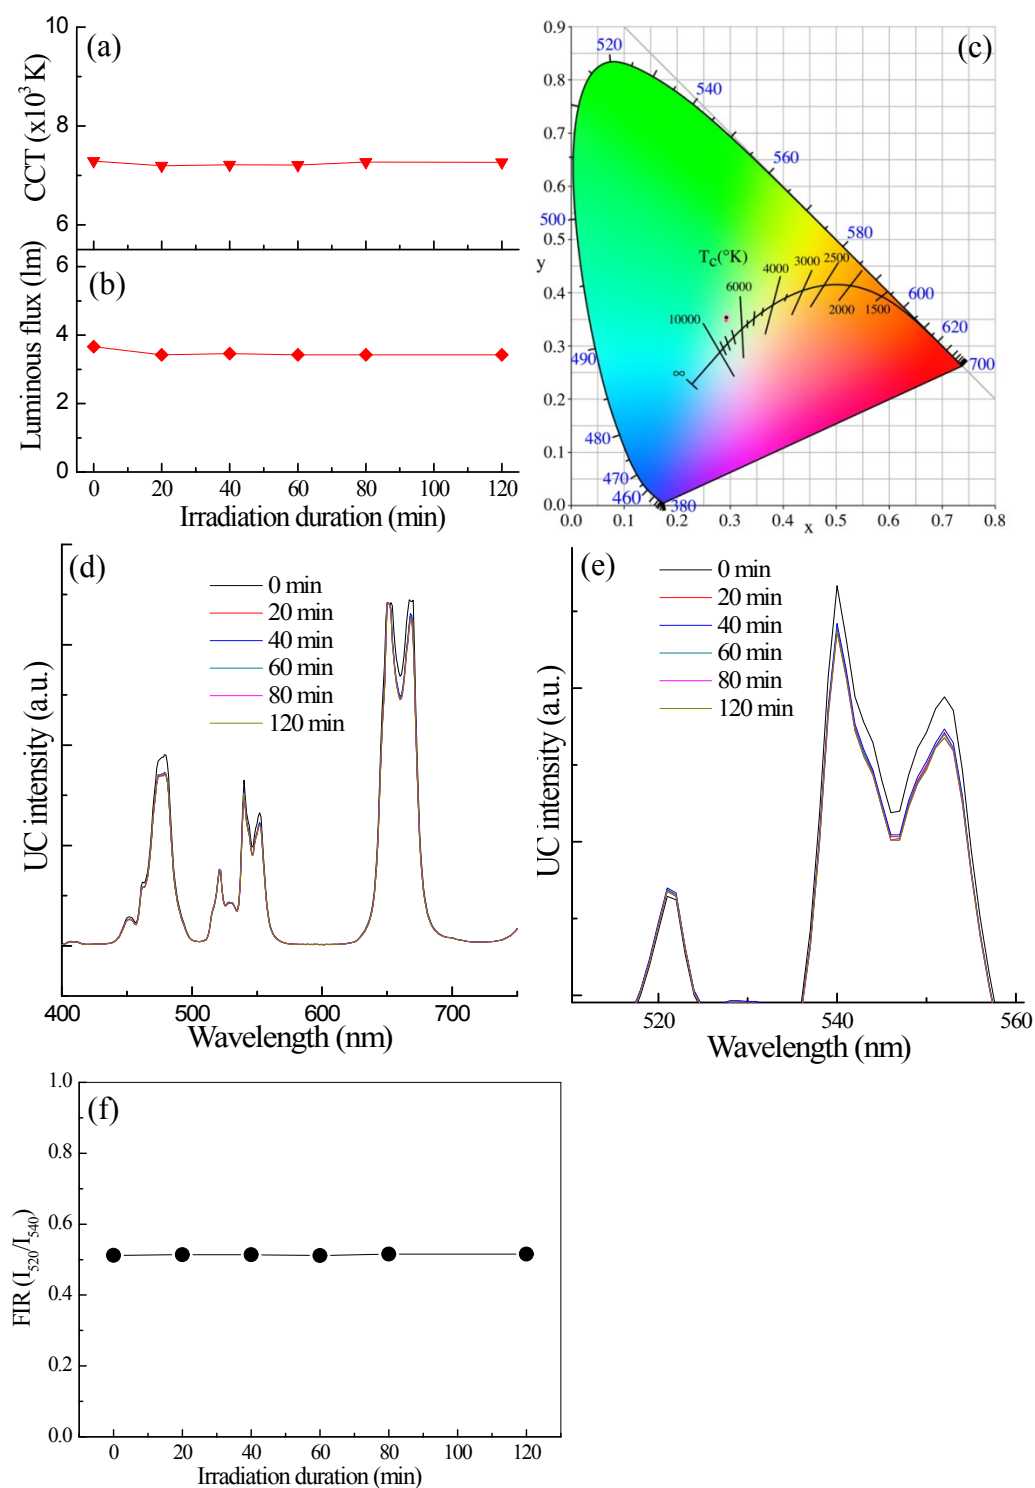

**Figure S9** Laser ( $230 \text{ W/cm}^2$ ) irradiation duration dependent (a) CCT, (b) luminous flux, (c) CIE color coordinates, (d, e) UC emission spectra and (f) FIR value for the constructed GC-based UC lighting. The Yb/Tm doped  $\beta\text{-NaYF}_4$  GC @ Yb/Er doped  $\alpha\text{-NaYF}_4$  GC stacking structure (denoted as Yb/Tm@Yb/Er) is used as color converter.
